# 1 Assessing the relationship of ancient and modern populations

2 Joshua G. Schraiber

3 Started on October 22, 2016. Compiled on July 24, 2017

## 4 **Abstract**

5 Genetic material sequenced from ancient samples is revolutionizing our understand-  
6 ing of the recent evolutionary past. However, ancient DNA is often degraded, resulting  
7 in low coverage, error-prone sequencing. Several solutions exist to this problem, rang-  
8 ing from simple approach such as selecting a read at random for each site to more  
9 complicated approaches involving genotype likelihoods. In this work, we present a  
10 novel method for assessing the relationship of an ancient sample with a modern popu-  
11 lation while accounting for sequencing error and post-mortem damage by analyzing raw  
12 read from multiple ancient individuals simultaneously. We show that when analyzing  
13 SNP data, it is better to sequence more ancient samples to low coverage: two samples  
14 sequenced to 0.5x coverage provide better resolution than a single sample sequenced  
15 to 2x coverage. We also examined the power to detect whether an ancient sample is  
16 directly ancestral to a modern population, finding that with even a few high cover-  
17 age individuals, even ancient samples that are very slightly diverged from the modern  
18 population can be detected with ease. When we applied our approach to European  
19 samples, we found that no ancient samples represent direct ancestors of modern Euro-  
20 peans. We also found that, as shown previously, the most ancient Europeans appear  
21 to have had the smallest effective population sizes, indicating a role for agriculture in  
22 modern population growth.

# 1 Introduction

Ancient DNA (aDNA) is now ubiquitous in population genetics. Advances in DNA isolation [Dabney et al., 2013], library preparation [Meyer et al., 2012], bone sampling [Pinhasi et al., 2015], and sequence capture Haak et al. [2015] make it possible to obtain genome-wide data from hundreds of samples [Haak et al., 2015, Mathieson et al., 2015, Allentoft et al., 2015, Fu et al., 2016]. Analysis of these data can provide new insight into recent evolutionary processes which leave faint signatures in modern genomes, including natural selection [Schraiber et al., 2016, Jewett et al., 2016] and population replacement [Sjödín et al., 2014, Lazaridis et al., 2014].

One of the most powerful uses of ancient DNA is to assess the continuity of ancient and modern populations. In many cases, it is unclear whether populations that occupied an area in the past are the direct ancestors of the current inhabitants of that area. However, this can be next to impossible to assess using only modern genomes. Questions of population continuity and replacement have particular relevance for the spread of cultures and technology in humans [Lazaridis et al., 2016]. For instance, recent work showed that modern South Americans are descended from people associated Clovis culture that inhabited North America over 10,000 years ago, providing further evidence toward our understanding of the peopling of the Americas [Rasmussen et al., 2014].

Despite its utility in addressing difficult-to-answer questions in evolutionary biology, aDNA also has several limitations. Most strikingly, DNA decays rapidly following the death of an organism, resulting in highly fragmented, degraded starting material when sequencing [Sawyer et al., 2012]. Thus, ancient data is frequently sequenced to low coverage and has a significantly higher rate of misleadingly called nucleotides than modern samples. When working with diploid data, as in aDNA extracted from plants and animals, the low coverage prevents genotypes from being called with confidence.

Several strategies are commonly used to address the low-coverage data. One of the

most common approaches is to sample a random read from each covered site and use that as a haploid genotype call [Skoglund et al., 2012, Haak et al., 2015, Mathieson et al., 2015, Allentoft et al., 2015, Fu et al., 2016, Lazaridis et al., 2016]. Many common approaches to the analyses of ancient DNA, such as the usage of F-statistics [Green et al., 2010, Patterson et al., 2012], are designed with this kind of dataset in mind. As shown by Peter [2016], F-statistics can be interpreted as linear combinations of simpler summary statistics and can often be understood in terms of testing a tree-like structure relating populations. Nonetheless, despite the simplicity and appeal of this approach, it has several drawbacks. Primarily, it throws away reads from sites that are covered more than once, resulting in a potential loss of information from expensive, difficult-to-acquire data. These approach are also strongly impacted by sequencing error, post-mortem damage, and contamination.

On the other hand, several approaches exist to either work with genotype likelihoods or the raw read data. Genotype likelihoods are the probabilities of the read data at a site given each of the three possible diploid genotypes at that site. They can be used in calculation of population genetic statistics or likelihood functions to average over uncertainty in the genotype [Korneliussen et al., 2014]. However, many such approaches assume that genotype likelihoods are fixed by the SNP calling algorithm (although they may be recalibrated to account for aDNA-specific errors, as in ?). However, with low coverage data, an increase in accuracy is expected if genotype likelihoods are co-estimated with other parameters of interest, due to the covariation between processes that influence read quality and genetic diversity, such as contamination.

A recent method that coestimates demographic parameters along with error and contamination rates by using genotype likelihoods showed that there can be significant power to assess the relationship of a single ancient sample to a modern population [Racimo et al., 2016]. Nonetheless, they found that for very low coverage data, inferences were not reliable. Thus, they were unable to apply their method to the large number of extremely low coverage ( $< 1x$ ) genomes that are available. Moreover, they were unable to explore the tradeoffs that come with a limited budget: can we learn

more by sequencing fewer individuals to high coverage, or more individuals at lower coverage?

Here, we develop a novel maximum likelihood approach for analyzing low coverage ancient DNA in relation to a modern population. We work directly with raw read data and explicitly model errors due to sequencing and post-mortem damage. Crucially, our approach incorporates data from multiple individuals that belong to the same ancient population, which we show substantially increases power and reduces error in parameter estimates. We then apply our new methodology to ancient human data, and show that we can perform accurate demographic inference even from very low coverage samples by analyzing them jointly.

## 2 Methods

### 2.1 Sampling alleles in ancient populations

We assume a scenario in which allele frequencies are known with high accuracy in a modern population. Suppose that an allele is known to be at frequency  $x \in (0, 1)$  in the modern population, and we wish to compute the probability of obtaining  $k$  copies of that allele in a sample of  $n$  ( $0 \leq k \leq n$ ) chromosomes from an ancient population. Conditioning on the frequency of the allele in the modern population minimizes the impact of ascertainment, and allows this approach to be used for SNP capture data.

To calculate the sampling probability, we assume a simple demographic model in which the ancient individual belongs to a population that split off from the modern population  $\tau_1$  generations ago, and subsequently existed as an isolated population for  $\tau_2$  generations. Further, we assume that the modern population has effective size  $N_e^{(1)}$  and that the ancient population has effective size  $N_e^{(2)}$ , and measure time in diffusion units,  $t_i = \tau_i / (2N_e^{(i)})$ . If we know the conditional probability that an allele is at frequency  $y$  in the ancient sample, given that it is at frequency  $x$ , denoted  $f(y; x, t_1, t_2)$ , then the

sampling probability is simply an integral,

$$\begin{aligned} P_{n,k}(x) &= \int_0^1 \binom{n}{k} y^k (1-y)^{n-k} f(y; x, t_1, t_2) dy \\ &= \binom{n}{k} \mathbb{E}_x (Y^k (1-Y)^{n-k}; t_1, t_2) \\ &\equiv \binom{n}{k} p_{n,k}(t_1, t_2) \end{aligned} \quad (1)$$

98 Thus, we must compute the binomial moments of the allele frequency distribution in  
99 the ancient population. In the Appendix, we show that this can be computed using  
100 matrix exponentiation,

$$p_{n,k}(t_1, t_2) = \left( e^{Qt_2} e^{Q^\downarrow t_1} \mathbf{h}_n \right)_i, \quad (2)$$

101 where  $(\mathbf{v})_i$  indicates the  $i$ th element of the vector  $\mathbf{v}$ ,  $\mathbf{h}_n = ((1-x)^n, x(1-x)^{n-1}, \dots, x^n)^T$   
102 and  $Q$  and  $Q^\downarrow$  are the sparse matrices

$$Q_{ij} = \begin{cases} \frac{1}{2}i(i-1) & \text{if } j = i-1 \\ -i(n-i) & \text{if } j = i \\ \frac{1}{2}(n-i)(n-i-1) & \text{if } j = i+1 \\ 0 & \text{else} \end{cases}$$

103 and

$$Q^\downarrow_{ij} = \begin{cases} \frac{1}{2}i(i-1) & \text{if } j = i-1 \\ -i(n-i+1) & \text{if } j = i \\ \frac{1}{2}(n-i+1)(n-i) & \text{if } j = i+1 \\ 0 & \text{else.} \end{cases}$$

104 This result has an interesting interpretation: the matrix  $Q^\downarrow$  can be thought of as  
105 evolving the allele frequencies back in time from the modern population to the common  
106 ancestor of the ancient and modern populations, while  $Q$  evolves the allele frequencies  
107 forward in time from the common ancestor to the ancient population (Fig 1).

[Figure 1 about here.]

Because of the fragmentation and degradation of DNA that is inherent in obtaining sequence data from ancient individuals, it is difficult to obtain the high coverage data necessary to make high quality genotype calls from ancient individuals. To address this, we instead work directly with raw read data, and average over all the possible genotypes weighted by their probability of producing the data. Specifically, we follow Nielsen et al. [2012] in modeling the probability of the read data in the ancient population, given the allele frequency at site  $l$  as

$$\mathbb{P}(R_l|k) = \sum_{g_{1,l}=0}^2 \dots \sum_{g_{n,l}=0}^2 \mathbb{I}\left(\sum_{i=1}^n g_{i,l} = k\right) \prod_{i=1}^n \binom{2}{g_{i,l}} \mathbb{P}(R_{i,l}|g_{i,l}),$$

where  $R_{i,l} = (a_{i,l}, d_{i,l})$  are the counts of ancestral and derived reads in individual  $i$  at site  $l$ ,  $g_{i,l} \in \{0, 1, 2\}$  indicates the possible genotype of individual  $i$  at site  $l$  (i.e. 0 = homozygous ancestral, 1 = heterozygous, 2 = homozygous derived), and  $\mathbb{P}(R_{i,l}|g_{i,l})$  is the probability of the read data at site  $l$  for individual  $i$ , assuming that the individual truly has genotype  $g_{i,l}$ . We use a binomial sampling with error model, in which the probability that a truly derived site appears ancestral (and vice versa) is given by  $\epsilon$ . We emphasize that the parameter  $\epsilon$  will capture both sequencing error as well as post-mortem damage (c.f. Racimo et al. [2016] who found that adding an additional parameter to specifically model post-mortem damage does not improve inferences). Thus,

$$\mathbb{P}(R|g) = \binom{a+d}{d} p_g^d (1-p_g)^a$$

with

$$\begin{aligned} p_0 &= \epsilon \\ p_1 &= \frac{1}{2} \\ p_2 &= 1 - \epsilon \end{aligned}$$

126

127 Combining these two aspects together by summing over possible allele frequencies  
128 weighted by their probabilities, we obtain our likelihood of the ancient data,

$$L(D) = \prod_{l=1}^L \sum_{k=0}^n \mathbb{P}(R_l|k) p_{n,k}(x_l). \quad (3)$$

129

## 3 Results

130

### 3.1 Impact of coverage and number of samples on inferences

131

132 To explore the tradeoff of sequencing more individuals at lower depth compared to fewer  
133 individuals at higher coverage, we performed simulations using `msprime` [Kelleher et al.,  
2016] combined with custom scripts to simulate error and low coverage data. Briefly, we  
134 assumed a Poisson distribution of reads at every site with mean given by the coverage,  
135 and then simulated reads by drawing from the binomial distribution described in the  
136 Methods.

137

138 First, we examined the impact of coverage and number of samples on the ability  
139 to recover the drift times in the modern and the ancient populations. Figure 2 shows  
140 results for data simulated with  $t_1 = 0.02$  and  $t_2 = 0.05$ , corresponding to an ancient  
141 individual who died 300 generations ago from population of effective size 1000. The  
142 populations split 400 generations ago, and the modern population has an effective  
size of 10000. We simulated approximately 180000 SNPs by simulating 100000 500

base pair fragments. Inferences of  $t_1$  can be relatively accurate even with only one low coverage ancient sample (Figure 2A). However, inferences of  $t_2$  benefit much more from increasing the number of ancient samples, as opposed to coverage (Figure 2B). In particular, two individuals sequenced to 0.5x coverage have a much lower error than a single individual sequenced to 2x coverage. To explore this effect further, we derived the sampling probability of alleles covered by exactly one sequencing read (see Appendix). We found that sites covered only once have no information about  $t_2$ , suggesting that evidence of heterozygosity is very important for inferences about  $t_2$ .

[Figure 2 about here.]

We next examined the impact of coverage and sampling on the power to reject the hypothesis that the ancient individuals came from a population that is directly ancestral to the modern population. We analyzed both low coverage (0.5x) and higher coverage (4x) datasets consisting of 1 (for both low and high coverage samples) or 5 individuals (only for low coverage). We simulated data with parameters identical to the previous experiment, except we now examined the impact of varying the age of the ancient sample from 0 generations ago through to the split time with the modern population. We then performed a likelihood ratio test comparing the null model of continuity, in which  $t_2 = 0$ , to a model in which the ancient population is not continuous. Figure 3 shows the power of the likelihood ratio test. For a single individual sequenced to low coverage, we see that the test only has power for very recently sampled ancient individuals (i.e. samples that are highly diverged from the modern population). However, the power increases dramatically as the number of individuals or the coverage per individual is increased; sequencing 5 individuals to 0.5x coverage results in essentially perfect power to reject continuity. Nonetheless, for samples that are very close to the divergence time, it will be difficult to determine if they are ancestral to the modern population or not, because differentiation is incomplete.

[Figure 3 about here.]



## 3.2 Impact of admixture

We examined two possible violations of the model to assess their impact on inference. In many situations, there may have been secondary contact between the population from which the ancient sample is derived and the modern population used as a reference. We performed simulations of this situation by modifying the previous simulations to include subsequent admixture from the ancient population to the modern population 200 generations ago (NB: this admixture occurred *more recently* than the ancient sample). In Figure 4, we show the results for admixture proportions ranging from 0 to 50%. Counterintuitively, estimates of  $t_1$  initially *decrease* before again increasing. This is likely a result of the increased heterozygosity caused by admixture, which acts to artificially inflate the effective size of the modern population, and thus decrease  $t_1$ . As expected,  $t_2$  is estimated to be smaller the more admixture there is; indeed, for an admixture rate of 100%, the modern and ancient samples are continuous. The impact on  $t_2$  appears to be linear, and is well approximated by  $(1 - f)t_2$  if the admixture fraction is  $f$ .

[Figure 4 about here.]

In other situations, there may be admixture from an unsampled “ghost” population into the modern population. If the ghost admixture is of a high enough proportion, it is likely to cause a sample that is in fact a member of a directly ancestral population to not appear to be ancestral. We explored this situation by augmenting our simulations in which the ancient sample is continuous with an outgroup population diverged from the modern population 0.04 time units ago (corresponding to 800 generations ago) and contributed genes to the modern population 0.01 time units ago (corresponding to 200 generations ago). We then assessed the impact on rejecting continuity using the likelihood ratio test (Figure 5). As expected, we see that low-power sampling strategies (such as a single individual sequenced to low coverage) are relatively unimpacted by ghost admixture. However, even relatively powerful sampling strategies can be robust to ghost admixture up to approximately 10%.

[Figure 5 about here.]

### 3.3 Application to ancient humans

We applied our approach to ancient human data from Mathieson et al. [2015], which is primarily derived from a SNP capture approach that targeted 1.2 million SNPs. Based on sampling location and associated archeological materials, the individuals were grouped into *a priori* panels, which we used to specify population membership when analyzing individuals together. We analyzed all samples for their relationship to the CEU individuals from the 1000 Genomes Project [Consortium, 2015]. Based on our results that suggested that extremely low coverage samples would yield unreliable estimates, we excluded panels that are composed of only a single individual sequenced to less than 2x coverage.

We computed maximum likelihood estimates of  $t_1$  and  $t_2$  for individuals as grouped into populations (Figure 6A; Table 1). We observe that  $t_2$  is significantly greater than 0 for all populations. Thus, none of these populations are consistent with directly making up a large proportion of the ancestry of modern CEU individuals. Strikingly, we see that  $t_2 \gg t_1$ , despite the fact that the ancient samples must have existed for fewer generations since the population split than the modern samples. This suggests that all of the ancient populations are characterized by extremely small effective population sizes.

[Table 1 about here.]

[Figure 6 about here.]

We further explored the relationship between the dates of the ancient samples and the parameters of the model by plotting  $t_1$  and  $t_2$  against the mean sample date of all samples in that population (Figure 6B, C). We expected to find that  $t_1$  correlated with sample age, under the assumption that samples were members of relatively short-lived populations that diverged from the “main-stem” of CEU ancestry. Instead, we

see no correlation between  $t_1$  and sample time, suggesting that the relationship of these populations to the CEU is complicated and not summarized well by the age of the samples. On the other hand, we see a strong positive correlation between  $t_2$  and sampling time ( $p < 1 \times 10^{-4}$ ). Because  $t_2$  is a compound parameter, it is difficult to directly interpret this relationship. However, it is consistent with the most ancient samples belonging to populations with the smallest effective sizes, consistent with previous observations [Skoglund et al., 2014].

Finally, we examined the impact of grouping individuals into populations in real data. We see that estimates of  $t_1$  for low coverage samples are typically lower when analyzed individually than when pooled with other individuals of the same panel (Figure 7A), suggesting a slightly downward bias in estimating  $t_1$  for low coverage samples. On the other hand, there is substantial bias toward overestimating  $t_2$  when analyzing samples individually, particularly for very low coverage samples (Figure 7B). This again shows that for estimates that rely on heterozygosity in ancient populations, pooling many low coverage individuals can significantly improve estimates.

[Figure 7 about here.]

## 4 Discussion

Ancient DNA (aDNA) presents unique opportunities to enhance our understanding of demography and selection in recent history. However, it also comes equipped with several challenges, due to postmortem DNA damage [Sawyer et al., 2012]. Several strategies have been developed to deal with the low quality of aDNA data, from relatively simple options like sampling a read at random at every site [Green et al., 2010] to more complicated methods making use of genotype likelihoods [Racimo et al., 2016]. Here, we presented a novel maximum likelihood approach for making inferences about how ancient populations are related to modern populations by analyzing read counts from multiple ancient individuals and explicitly modeling relationship between the two populations. We explicitly condition on the allele frequency in a modern population;

thus, our method is robust to ascertainment in modern samples and can be used with SNP capture data. Using this approach, we examined some aspects of sampling strategy for aDNA analysis and we applied our approach to ancient humans.

We found that sequencing many individuals from an ancient population to low coverage (0.5-1x) can be a significantly more cost effective strategy than sequencing fewer individuals to relatively high coverage. For instance, we saw from simulations that far more accurate estimates of the drift time in an ancient population can be obtained by pooling 2 individuals at 0.5x coverage than by sequencing a single individual to 2x coverage (Figure 2). We saw this replicated in our analysis of the real data: low coverage individuals showed a significant amount of variation and bias in estimating the model parameters that was substantially reduced when individuals were analyzed jointly in a population (Figure 7). To explore this further, we showed that sites sequenced to 1x coverage in a single individual retain no information about the drift time in the ancient population. This can be intuitively understood because the drift time in the ancient population is strongly related the amount of heterozygosity in the ancient population: an ancient population with a longer drift time will have lower heterozygosity at sites shared with a modern population. When a site is only sequenced once in a single individual, there is no information about the heterozygosity of that site. We also observed a pronounced upward bias in estimates of the drift time in the ancient population from low coverage samples. We speculate that this is due to the presence of few sites covered more than once being likely to be homozygous, thus deflating the estimate of heterozygosity in the ancient population. Thus, for analysis of SNP data, we recommend that aDNA sampling be conducted to maximize the number of individuals from each ancient population that can be sequenced to  $\sim 1x$ , rather than attempting to sequence fewer individuals to high coverage.

When we looked at the impact of model misspecification, we saw several important patterns. First, the influence of admixture from the ancient population on inferences of  $t_2$  is approximately linear, suggesting that if there are estimates of the amount of admixture between the modern and ancient population, a bias-corrected estimate of

$t_2$  could be produced (Figure 4B). The impact on inference of  $t_1$  is more complicated: admixture actually *reduces* estimates of  $t_1$  (Figure 4A). This is likely because admixture increases the heterozygosity in the modern population, thus causing the amount of drift time to seem reduced. In both cases, the bias is not impacted by details of sampling strategy, although the variance of estimates is highly in a way consistent with Figure 2.

Of particular interest in many studies of ancient populations is the question of direct ancestry: are the ancient samples members of a population that contributed substantially to a modern population? We emphasize that this does not mean that the particular samples were direct ancestors of any modern individuals; indeed, this is exceedingly unlikely for old samples [Rohde et al., 2004, Chang, 1999, Baird et al., 2003, Donnelly, 1983]. Instead, we are asking whether an ancient sample was a member of a population that is directly continuous with a modern population. Several methods have been proposed to test this question, but thus far they have been limited to many individuals sequenced at a single locus [Sjödén et al., 2014] or to a single individual with genome-wide data [Rasmussen et al., 2014]. Our approach provides a rigorous, maximum likelihood framework for testing questions of population continuity using multiple low coverage ancient samples. We saw from simulations (Figure 3) that data from single, low coverage individuals result in very little power to reject the null hypothesis of continuity unless the ancient sample is very recent (i.e. it has been diverged from the modern population for a long time). Nonetheless, when low coverage individuals are pooled together, or a single high coverage individual is used, there is substantial power to reject continuity for all but the most ancient samples (i.e. samples dating from very near the population split time).

Because many modern populations may have experienced admixture from unsampled “ghost” populations, we also performed simulations to test the impact of ghost admixture on the probability of falsely rejecting continuity. We find that single ancient samples do not provide sufficient power to reject continuity even for high levels of ghost admixture, while increasingly powerful sampling schemes, adding more individ-

uals or higher coverage per individual, reject continuity at higher rates. However, in these situations, whether we regard rejection of continuity as a false or true discovery is somewhat subjective: how much admixture from an outside population is required before considering a population to not be directly ancestral? In future work it will be extremely important to estimate the “maximum contribution” of the population an ancient sample comes from (c.f Sjödin et al. [2014]).

To gain new insights from empirical data, we applied our approach to ancient samples throughout Europe. Notably, we rejected continuity for all populations that we analyzed. This is unsurprising, given that European history is extremely complicated and has been shaped by many periods of admixture [Lazaridis et al., 2014, Haak et al., 2015, Lazaridis et al., 2016]. Thus, modern Europeans have experienced many periods of “ghost” admixture (relative to any particular ancient sample). Nonetheless, our results show that none of these populations are even particularly close to directly ancestral, as our simulations have shown that rejection of continuity is robust to low levels of ghost admixture.

Secondly, we observed that the drift time in the ancient population was much larger than the drift time in the modern population. Assuming that the ancient sample were a contemporary sample, the ratio  $t_1/t_2$  is an estimator of the ratio  $N_e^{(2)}/N_e^{(1)}$ ; in fact, because the ancient sample existed for fewer generations since the common ancestor of the ancient and modern populations,  $t_1/t_2$  acts as an upper bound on  $N_e^{(2)}/N_e^{(1)}$ . Moreover, this is unlikely to be due to unmodeled error in the ancient samples: error would be expected increase the heterozygosity in the ancient sample, and thus *decrease* our estimates of  $t_2$ . Thus, we find strong support for the observation that ancient Europeans were often members of small, isolated populations [Skoglund et al., 2014]. We interpret these two results together as suggestive that many ancient samples found thus far in Europe were members of small populations that ultimately went locally extinct.

We further examined the effective sizes of ancient populations through time by looking for a correlation between the age of the ancient populations and the drift

time leading to them (Figure 6C). We saw a strong positive correlation, and although this drift time is a compound parameter, which complicates interpretations, it appears that the oldest Europeans were members of the smallest populations, and that effective population size has grown through time as agriculture spread through Europe.

We anticipate the further development of methods that explicitly account for differential drift times in ancient and modern samples will become important as aDNA research becomes even more integrating into population genomics. This is because many common summary methods, such as the use of Structure [Pritchard et al., 2000] and Admixture [Alexander et al., 2009], are sensitive to differential amounts of drift between populations [Falush et al., 2016]. As we’ve shown in ancient Europeans, ancient samples tend to come from isolated subpopulations with a large amount of drift, thus confounding such summary approaches. Moreover, standard population genetics theory shows that allele frequencies are expected to be deterministically lower in ancient samples, even if they are direct ancestors of a modern population. Intuitively, this arises because the alleles must have arisen at some point from new mutations, and thus were at lower frequencies in the past. A potentially fruitful avenue to combine these approaches moving forward may be to separate regions of the genome based on ancestry components, and assess the ancestry of ancient samples relative to specific ancestry components, rather than to genomes as a whole.

Our current approach leaves several avenues for improvement. We use a relatively simple error model that wraps up both post-mortem damage and sequencing error into a single parameter. While Racimo et al. [2016] shows that adding an additional parameter for PMD-related error does not significantly change results, the recent work of ? shows that building robust error models is challenging and essential to estimating heterozygosity properly. Although our method is robust to non-constant demography because we consider only alleles that are segregating in both the modern and the ancient population, we are losing information by not modeling new mutations that arise in the ancient population. Similarly, we only consider a single ancient population at a time, albeit with multiple samples. Ideally, ancient samples would be embedded in complex

demographic models that include admixture, detailing their relationships to each other and to modern populations [Patterson et al., 2012, Lipson and Reich, 2017]. However, inference of such complex models is difficult, and though there has been some progress in simplified cases [Lipson et al., 2014, Pickrell and Pritchard, 2012], it remains an open problem due to the difficulty of simultaneously inferring a non-tree-like topology along with demographic parameters. Software such as *mom* [Kamm et al., 2016] that can compute the likelihood of SNP data in an admixture graph may be able to be used to integrate over genotype uncertainty in larger settings than considered here.

## 5 Appendix

### 5.1 Computing allele frequency moments in the ancient population

We wish to compute moments of the form

$$\mathbb{E}_x(g(Y); t_1, t_2) = \int_0^1 g(y) f(y; x, t_1, t_2) dy. \quad (4)$$

To do so, we make use of several results from diffusion theory. To ensure that this paper is self contained, we briefly review those results here. The interested reader may find much of this material covered in Ewens [2012], Karlin and Taylor [1981]. Several similar calculations can be found in Griffiths [2003].

Let the probability of an allele going from frequency  $x$  to frequency  $y$  in  $\tau$  generations in a population of size  $N_e$  be  $f(x, y; t)$ , where  $t = \tau / (2N_e)$ . Under a wide variety of models, the change in allele frequencies through time is well approximated by the Wright-Fisher diffusion, which is characterized by its generator,

$$\mathcal{L} = \frac{1}{2} x(1-x) \frac{d^2}{dx^2}.$$

The generator of a diffusion process is useful, because it can be used to define a differ-



388 ential equation for the moments of that process,

$$\frac{d}{dt}\mathbb{E}_x(g(X_t)) = \mathbb{E}_x(\mathcal{L}g(X_t)). \quad (5)$$

389 We will require the *speed measure* of the Wright-Fisher diffusion,  $m(x) = x^{-1}(1 -$   
 390  $x)^{-1}$ , which essentially describes how slow a diffusion at position  $x$  is “moving” com-  
 391 pared to a Brownian motion at position  $x$ . Note that all diffusions are reversible with  
 392 respect to their speed measures, i.e.

$$m(x)f(x, y; t) = m(y)f(y, x; t).$$

393 We additionally require the probability of loss, i.e. the probability that the allele  
 394 currently at frequency  $x$  is ultimately lost from the population. This is

$$u_0(x) = 1 - x.$$

395 Note that it is possible to condition the Wright-Fisher diffusion to eventually be lost.  
 396 The transition density can be computed as

$$f^\downarrow(x, y; t) = f(x, y; t) \frac{u_0(y)}{u_0(x)}$$

397 by using Bayes theorem. The diffusion conditioned on loss is characterized by its  
 398 generator,

$$\mathcal{L}^\downarrow = -x \frac{d}{dx} + \frac{1}{2} x(1-x) \frac{d^2}{dx^2}.$$

399 In an infinite sites model, in which mutations occur at the times of a Poisson  
 400 process with rate  $\theta/2$  and then each drift according to the Wright-Fisher diffusion, a  
 401 quasi-equilibrium distribution will be reached, known as the frequency spectrum. The  
 402 frequency spectrum,  $\phi(x)$ , predicts the number of sites at frequency  $x$ , and can be

403 written in terms of the speed measure and the probability of loss,

$$\phi(x) = \theta m(x) u_0(x).$$

404 To proceed with calculating (4), note that the conditional probability of an allele  
405 being at frequency  $y$  in the ancient population given that it's at frequency  $x$  in the  
406 modern population can be calculated

$$f(y; x, t_1, t_2) = \frac{f(x, y; t_1, t_2)}{\phi(x)}$$

407 where  $f(x, y; t_1, t_2)$  is the joint probability of the allele frequencies in the modern and  
408 ancient populations and  $\phi(x)$  is the frequency spectrum in the modern population.

409 Assuming that the ancestral population of the modern and ancient samples was at  
410 equilibrium, the joint distribution of allele frequencies can be computed by sampling  
411 alleles from the frequency spectrum of the ancestor and evolving them forward in time  
412 via the Wright-Fisher diffusion. This can be written mathematically as

$$f(x, y; t_1, t_2) = \int_0^1 f(z, x; t_1) f(z, y; t_2) \phi(z) dz.$$

We now expand the frequency spectrum in terms of the speed measure and the probability of loss and use reversibility with respect to the speed measure to rewrite the equation,

$$\begin{aligned} \int_0^1 f(z, x; t_1) f(z, y; t_2) \phi(z) dz &= \theta \int_0^1 f(z, x; t_1) f(z, y; t_2) m(z) u_0(z) dz \\ &= \theta \int_0^1 \frac{m(x)}{m(z)} f(x, z; t_1) f(z, y; t_2) m(z) u_0(z) dz \\ &= \theta m(x) u_0(x) \int_0^1 f(x, z; t_1) \frac{u_0(z)}{u_0(x)} f(z, y; t_2) dz \\ &= \phi(x) \int_0^1 f^\downarrow(x, z; t_1) f(z, y; t_2) dz. \end{aligned}$$

413 The third line follows by multiplying by  $u_0(x)/u_0(x) = 1$ . This equation has the inter-  
 414 pretation of sampling an allele from the frequency spectrum in the modern population,  
 415 then evolving it *backward* in time to the common ancestor, before evolving it *forward*  
 416 in time to the ancient population. The interpretation of the diffusion conditioned on  
 417 loss as evolving backward in time arises by considering the fact that alleles arose from  
 418 unique mutations at some point in the past; hence, looking backward, alleles must  
 419 eventually be lost at some point in the past.

To compute the expectation, we substitute this form for the joint probability into (4),

$$\begin{aligned} \int_0^1 g(y) f(y; x, t_1, t_2) dy &= \int_0^1 g(y) \left( \int_0^1 f^\downarrow(x, z; t_1) f(z, y; t_2) dz \right) dy \\ &= \int_0^1 \left( \int_0^1 g(y) f(z, y; t_2) dy \right) f^\downarrow(x, z; t_1) dz, \end{aligned}$$

where the second line follows by rearranging terms and exchanging the order of integration. Note that this formula takes the form of nested expectations. Specifically,

$$\begin{aligned} \int_0^1 g(y) f(z, y; t_2) dy &= \mathbb{E}_z(g(Y_{t_2})) \\ &\equiv h(z) \end{aligned}$$

and

$$\begin{aligned} \int_0^1 h(z) f^\downarrow(x, z; t_1) dz &= \mathbb{E}_x^\downarrow(h(Z_{t_1})) \\ &= \mathbb{E}_x(g(Y); t_1, t_2). \end{aligned}$$

420 We now use (5) to note that

$$\frac{d}{dt} p_{n,k} = \frac{k(k-1)}{2} p_{n,k-1} - k(n-k) p_{n,k} + \frac{(n-k)(n-k-1)}{2} p_{n,k+1}$$

421 and

$$\frac{d}{dt}p_{n,k}^\downarrow = \frac{k(k-1)}{2}p_{n,k-1}^\downarrow - k(n-k+1)p_{n,k}^\downarrow + \frac{(n-k+1)(n-k)}{2}p_{n,k+1}^\downarrow$$

422 with obvious boundary conditions  $p_{n,k}(0; z) = z^k(1-z)^{n-k}$  and  $p_{n,k}^\downarrow(0; x) = x^k(1-x)^{n-k}$ .  
423

424 These systems of differential equations can be rewritten as matrix differential equa-  
425 tions with coefficient matrices  $Q$  and  $Q^\downarrow$  respectively. Because they are linear, first  
426 order equations, they can be solved by matrix exponentiation. Because the expectation  
427 of a polynomial in the Wright-Fisher diffusion remains a polynomial, the nested expect-  
428 ations can be computed via matrix multiplication of the solutions to these differential  
429 equations, yielding the formula (2).

## 430 5.2 Sites covered exactly once have no information about drift 431 in the ancient population

432 Consider a simplified model in which each site has exactly one read. When we have  
433 sequence from only a single individual, we have a set  $l_a$  of sites where the single read is  
434 an ancestral allele and a set  $l_d$  of sites where the single read is a derived allele. Thus,  
435 we can rewrite (3) as

$$L(D) = \prod_{l \in l_a} \left( (1-\epsilon)P_{2,0}(x_l) + \frac{1}{2}P_{2,1}(x_l) + \epsilon P_{2,2}(x_l) \right) \prod_{l \in l_d} \left( \epsilon P_{2,0}(x_l) + \frac{1}{2}P_{2,1}(x_l) + (1-\epsilon)P_{2,2}(x_l) \right).$$

We can use formulas from Racimo et al. [2016] to compute  $P_{2,k}(x_l)$  for  $k \in \{0, 1, 2\}$ ,

$$\begin{aligned} P_{2,0}(x_l) &= 1 - x_l e^{-t_1} - \frac{1}{2}x_l e^{-(t_1+t_2)} + x_l \left( x_l - \frac{1}{2} \right) e^{-(3t_1+t_2)} \\ P_{2,1}(x_l) &= x_l e^{-(t_1+t_2)} + x_l (1 - 2x_l) e^{-(3t_1+t_2)} \\ P_{2,2}(x_l) &= x_l e^{-t_1} - \frac{1}{2}x_l e^{-(t_1+t_2)} + x_l \left( x_l - \frac{1}{2} \right) e^{-(3t_1-t_2)}. \end{aligned}$$

436 Note then that

$$(1 - \epsilon)P_{2,0}(x_l) + \frac{1}{2}P_{2,1}(x_l) + \epsilon P_{2,2}(x_l) = 1 - \epsilon - x(1 - 2\epsilon)e^{-t_1}$$

437 and

$$\epsilon P_{2,0}(x_l) + \frac{1}{2}P_{2,1}(x_l) + (1 - \epsilon)P_{2,2}(x_l) = \epsilon + x(1 - 2\epsilon)e^{-t_1}.$$

438 Neither of these formulas depend on  $t_2$ ; hence, there is no information about the drift  
439 time in the ancient population from data that is exactly 1x coverage.

## 440 6 Software Availability

441 Python implementations of the described methods are available at [www.github.com/schraiber/continuity/](http://www.github.com/schraiber/continuity/)

## 442 7 Acknowledgments

443 We wish to thank Melinda Yang, Iain Mathieson, Pontus Skoglund, and Fernando  
444 Racimo for several discussions during the conception of this work that greatly improved  
445 its scope and rigor. We are grateful to Fernando Racimo and Benjamin Vernot for  
446 comments on early versions of this work that significantly improved its quality. We  
447 also appreciate comments on the preprint from Alex Kim and Aylwyn Scally. We  
448 would also like to thank Tamara Broderick for several stimulating discussions about  
449 clustering that ultimately didn't result in any interesting application to ancient DNA.

## 450 References

451 David H Alexander, John Novembre, and Kenneth Lange. Fast model-based estimation  
452 of ancestry in unrelated individuals. *Genome research*, 19(9):1655–1664, 2009.

453 Morten E Allentoft, Martin Sikora, Karl-Göran Sjögren, Simon Rasmussen, Morten  
454 Rasmussen, Jesper Stenderup, Peter B Damgaard, Hannes Schroeder, Torbjörn

455 Ahlström, Lasse Vinner, et al. Population genomics of bronze age eurasia. *Nature*, 522(7555):167–172, 2015.

456

457 SJE Baird, NH Barton, and AM Etheridge. The distribution of surviving blocks of an  
458 ancestral genome. *Theoretical population biology*, 64(4):451–471, 2003.

459 Joseph T Chang. Recent common ancestors of all present-day individuals. *Advances*  
460 *in Applied Probability*, 31(4):1002–1026, 1999.

461 1000 Genomes Project Consortium. A global reference for human genetic variation.  
462 *Nature*, 526(7571):68–74, 2015.

463 Jesse Dabney, Matthias Meyer, and Svante Pääbo. Ancient dna damage. *Cold Spring*  
464 *Harbor perspectives in biology*, 5(7):a012567, 2013.

465 Kevin P Donnelly. The probability that related individuals share some section of  
466 genome identical by descent. *Theoretical population biology*, 23(1):34–63, 1983.

467 Warren J Ewens. *Mathematical population genetics 1: theoretical introduction*, vol-  
468 ume 27. Springer Science & Business Media, 2012.

469 Daniel Falush, Lucy van Dorp, and Daniel Lawson. A tutorial on how (not) to over-  
470 interpret structure/admixture bar plots. *bioRxiv*, page 066431, 2016.

471 Qiaomei Fu, Cosimo Posth, Mateja Hajdinjak, Martin Petr, Swapan Mallick, Daniel  
472 Fernandes, Anja Furtwängler, Wolfgang Haak, Matthias Meyer, Alissa Mittnik, et al.  
473 The genetic history of ice age europe. *Nature*, 2016.

474 Richard E Green, Johannes Krause, Adrian W Briggs, Tomislav Maricic, Udo Stenzel,  
475 Martin Kircher, Nick Patterson, Heng Li, Weiwei Zhai, Markus Hsi-Yang Fritz, et al.  
476 A draft sequence of the neandertal genome. *science*, 328(5979):710–722, 2010.

477 RC Griffiths. The frequency spectrum of a mutation, and its age, in a general diffusion  
478 model. *Theoretical population biology*, 64(2):241–251, 2003.

479 Wolfgang Haak, Iosif Lazaridis, Nick Patterson, Nadin Rohland, Swapan Mallick,  
480 Bastien Llamas, Guido Brandt, Susanne Nordenfelt, Eadaoin Harney, Kristin Stew-  
481 ardson, et al. Massive migration from the steppe was a source for indo-european  
482 languages in europe. *Nature*, 522(7555):207–211, 2015.

483 Ethan M Jewett, Matthias Steinrücken, and Yun S Song. The effects of population  
484 size histories on estimates of selection coefficients from time-series genetic data.  
485 *Molecular Biology and Evolution*, page msw173, 2016.

486 John A Kamm, Jonathan Terhorst, and Yun S Song. Efficient computation of the joint  
487 sample frequency spectra for multiple populations. *Journal of Computational and*  
488 *Graphical Statistics*, (just-accepted):1–37, 2016.

489 Samuel Karlin and Howard E Taylor. *A second course in stochastic processes*. Elsevier,  
490 1981.

491 Jerome Kelleher, Alison M Etheridge, and Gilean McVean. Efficient coalescent sim-  
492 ulation and genealogical analysis for large sample sizes. *PLoS Comput Biol*, 12(5):  
493 e1004842, 2016.

494 Thorfinn Sand Korneliussen, Anders Albrechtsen, and Rasmus Nielsen. Angsd: analysis  
495 of next generation sequencing data. *BMC bioinformatics*, 15(1):356, 2014.

496 Iosif Lazaridis, Nick Patterson, Alissa Mittnik, Gabriel Renaud, Swapan Mallick,  
497 Karola Kirsanow, Peter H Sudmant, Joshua G Schraiber, Sergi Castellano, Mark  
498 Lipson, et al. Ancient human genomes suggest three ancestral populations for  
499 present-day europeans. *Nature*, 513(7518):409–413, 2014.

500 Iosif Lazaridis, Dani Nadel, Gary Rollefson, Deborah C Merrett, Nadin Rohland, Swa-  
501 pan Mallick, Daniel Fernandes, Mario Novak, Beatriz Gamarra, Kendra Sirak, et al.  
502 Genomic insights into the origin of farming in the ancient near east. *Nature*, 536  
503 (7617):419–424, 2016.

504 Mark Lipson and David Reich. Working model of the deep relationships of diverse  
505 modern human genetic lineages outside of africa. *Molecular Biology and Evolution*,  
506 page msw293, 2017.

507 Mark Lipson, Po-Ru Loh, Nick Patterson, Priya Moorjani, Ying-Chin Ko, Mark  
508 Stoneking, Bonnie Berger, and David Reich. Reconstructing austronesian popu-  
509 lation history in island southeast asia. *Nature communications*, 5, 2014.

510 Iain Mathieson, Iosif Lazaridis, Nadin Rohland, Swapan Mallick, Nick Patterson,  
511 Songül Alpaslan Roodenberg, Eadaoin Harney, Kristin Stewardson, Daniel Fernan-  
512 des, Mario Novak, et al. Genome-wide patterns of selection in 230 ancient eurasians.  
513 *Nature*, 528(7583):499–503, 2015.

514 Matthias Meyer, Martin Kircher, Marie-Theres Gansauge, Heng Li, Fernando Racimo,  
515 Swapan Mallick, Joshua G Schraiber, Flora Jay, Kay Prüfer, Cesare De Filippo, et al.  
516 A high-coverage genome sequence from an archaic denisovan individual. *Science*, 338  
517 (6104):222–226, 2012.

518 Rasmus Nielsen, Thorfinn Korneliussen, Anders Albrechtsen, Yingrui Li, and Jun  
519 Wang. Snp calling, genotype calling, and sample allele frequency estimation from  
520 new-generation sequencing data. *PloS one*, 7(7):e37558, 2012.

521 Nick Patterson, Priya Moorjani, Yontao Luo, Swapan Mallick, Nadin Rohland, Yiping  
522 Zhan, Teri Genschoreck, Teresa Webster, and David Reich. Ancient admixture in  
523 human history. *Genetics*, 192(3):1065–1093, 2012.

524 Benjamin M Peter. Admixture, population structure, and f-statistics. *Genetics*, 202  
525 (4):1485–1501, 2016.

526 Joseph K Pickrell and Jonathan K Pritchard. Inference of population splits and mix-  
527 tures from genome-wide allele frequency data. *PLoS Genet*, 8(11):e1002967, 2012.

528 Ron Pinhasi, Daniel Fernandes, Kendra Sirak, Mario Novak, Sarah Connell, Songül  
529 Alpaslan-Roodenberg, Fokke Gerritsen, Vyacheslav Moiseyev, Andrey Gromov, Pál



530 Raczky, et al. Optimal ancient dna yields from the inner ear part of the human  
531 petrous bone. *PloS one*, 10(6):e0129102, 2015.

532 Jonathan K Pritchard, Matthew Stephens, and Peter Donnelly. Inference of population  
533 structure using multilocus genotype data. *Genetics*, 155(2):945–959, 2000.

534 Fernando Racimo, Gabriel Renaud, and Montgomery Slatkin. Joint estimation of  
535 contamination, error and demography for nuclear dna from ancient humans. *PLoS*  
536 *Genet*, 12(4):e1005972, 2016.

537 Morten Rasmussen, Sarah L Anzick, Michael R Waters, Pontus Skoglund, Michael De-  
538 Giorgio, Thomas W Stafford Jr, Simon Rasmussen, Ida Moltke, Anders Albrechtsen,  
539 Shane M Doyle, et al. The genome of a late pleistocene human from a clovis burial  
540 site in western montana. *Nature*, 506(7487):225–229, 2014.

541 Douglas LT Rohde, Steve Olson, and Joseph T Chang. Modelling the recent common  
542 ancestry of all living humans. *Nature*, 431(7008):562, 2004.

543 Susanna Sawyer, Johannes Krause, Katerina Guschanski, Vincent Savolainen, and  
544 Svante Pääbo. Temporal patterns of nucleotide misincorporations and dna frag-  
545 mentation in ancient dna. *PloS one*, 7(3):e34131, 2012.

546 Joshua G Schraiber, Steven N Evans, and Montgomery Slatkin. Bayesian inference of  
547 natural selection from allele frequency time series. *Genetics*, 203(1):493–511, 2016.

548 Per Sjödin, Pontus Skoglund, and Mattias Jakobsson. Assessing the maximum con-  
549 tribution from ancient populations. *Molecular biology and evolution*, page msu059,  
550 2014.

551 Pontus Skoglund, Helena Malmström, Maanasa Raghavan, Jan Storå, Per Hall, Eske  
552 Willerslev, M Thomas P Gilbert, Anders Götherström, and Mattias Jakobsson. Ori-  
553 gins and genetic legacy of neolithic farmers and hunter-gatherers in europe. *Science*,  
554 336(6080):466–469, 2012.

555 Pontus Skoglund, Helena Malmström, Ayça Omrak, Maanasa Raghavan, Cristina  
556 Valdiosera, Torsten Günther, Per Hall, Kristiina Tambets, Jüri Parik, Karl-Göran  
557 Sjögren, et al. Genomic diversity and admixture differs for stone-age scandinavian  
558 foragers and farmers. *Science*, 344(6185):747–750, 2014.

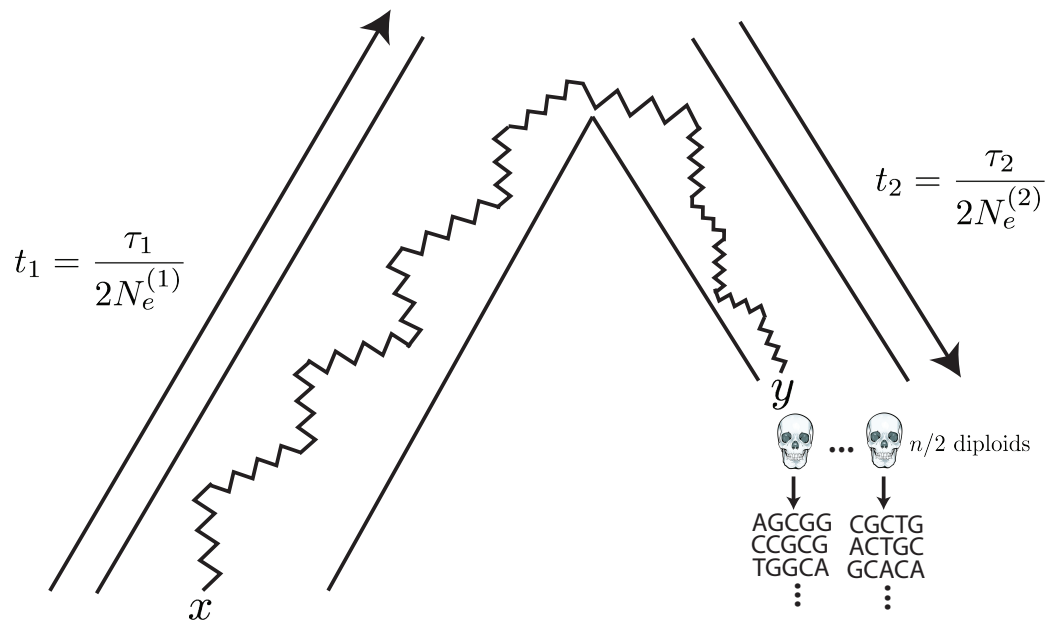

Figure 1: The generative model. Alleles are found at frequency  $x$  in the modern population and are at frequency  $y$  in the ancient population. The modern population has effective size  $N_e^{(1)}$  and has evolved for  $\tau_1$  generations since the common ancestor of the modern and ancient populations, while the ancient population is of size  $N_e^{(2)}$  and has evolved for  $\tau_2$  generations. Ancient diploid samples are taken and sequenced to possibly low coverage, with errors. Arrows indicate that the sampling probability can be calculated by evolving alleles *backward* in time from the modern population and then *forward* in time to the ancient population.

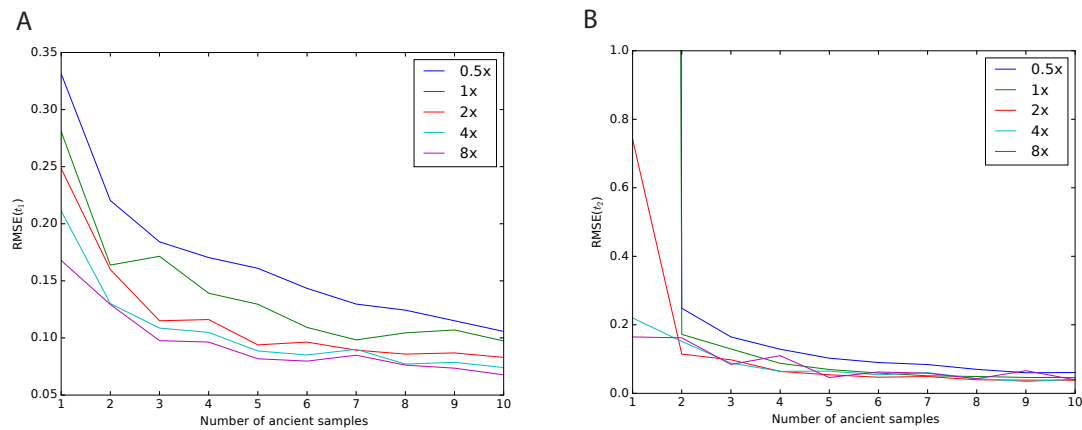

Figure 2: Impact of sampling scheme on parameter estimation error. In each panel, the  $x$  axis represents the number of simulated ancient samples, while the  $y$  axis shows the relative root mean square error for each parameter. Each different line corresponds to individuals sequenced to different depth of coverage. Panel A shows results for  $t_1$  while panel B shows results for  $t_2$ . Simulated parameters are  $t_1 = 0.02$  and  $t_2 = 0.05$ .

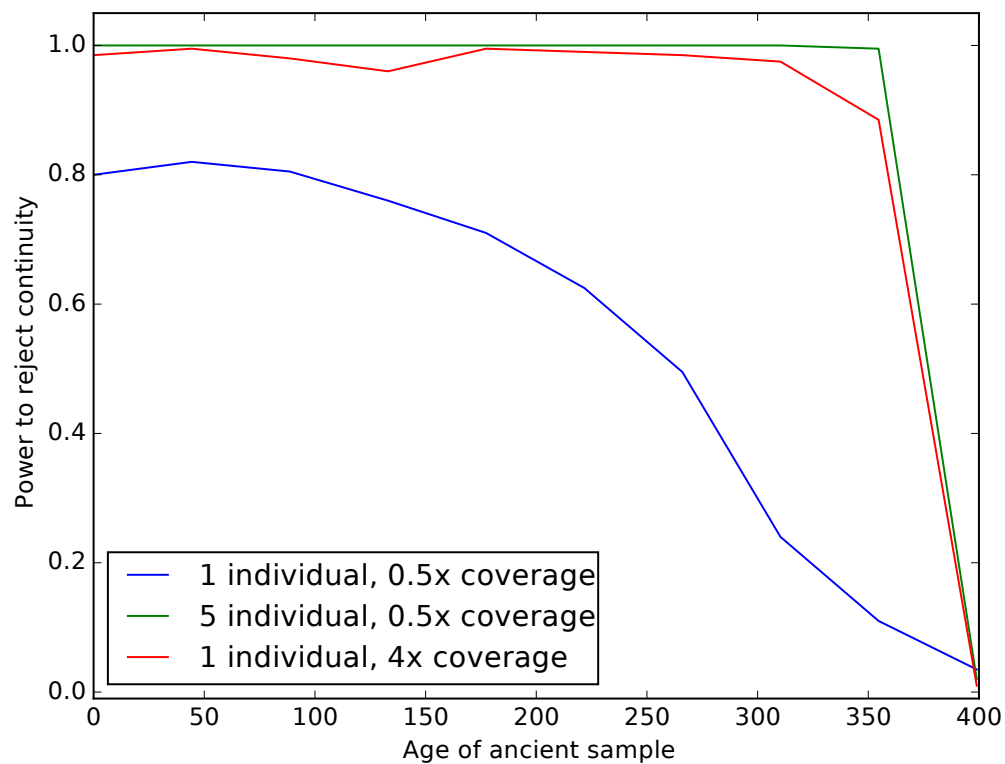

Figure 3: Impact of sampling scheme on rejecting population continuity. The  $x$  axis represents the age of the ancient sample in generations, with 0 indicating a modern sample and 400 indicating a sample from exactly at the split time 400 generations ago. The  $y$  axis shows the proportion of simulations in which we rejected the null hypothesis of population continuity. Each line shows different sampling schemes, as explained in the legend.

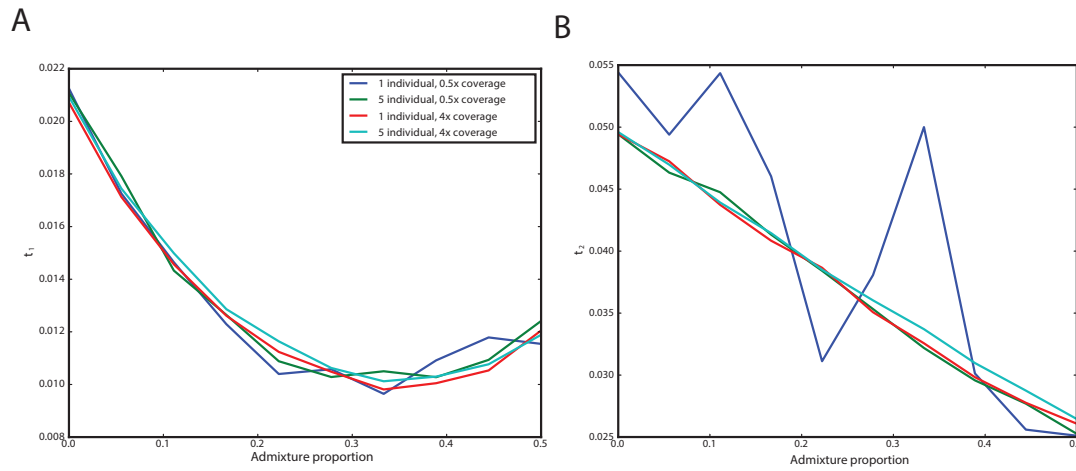

Figure 4: Impact of admixture from the ancient population on inferred parameters. The  $x$  axis shows the admixture proportion and the  $y$  axis shows the average parameter estimate across simulations. Each line corresponds to a different sampling strategy, as indicated in the legend. Panel A shows results for  $t_1$  and Panel B shows results for  $t_2$ .

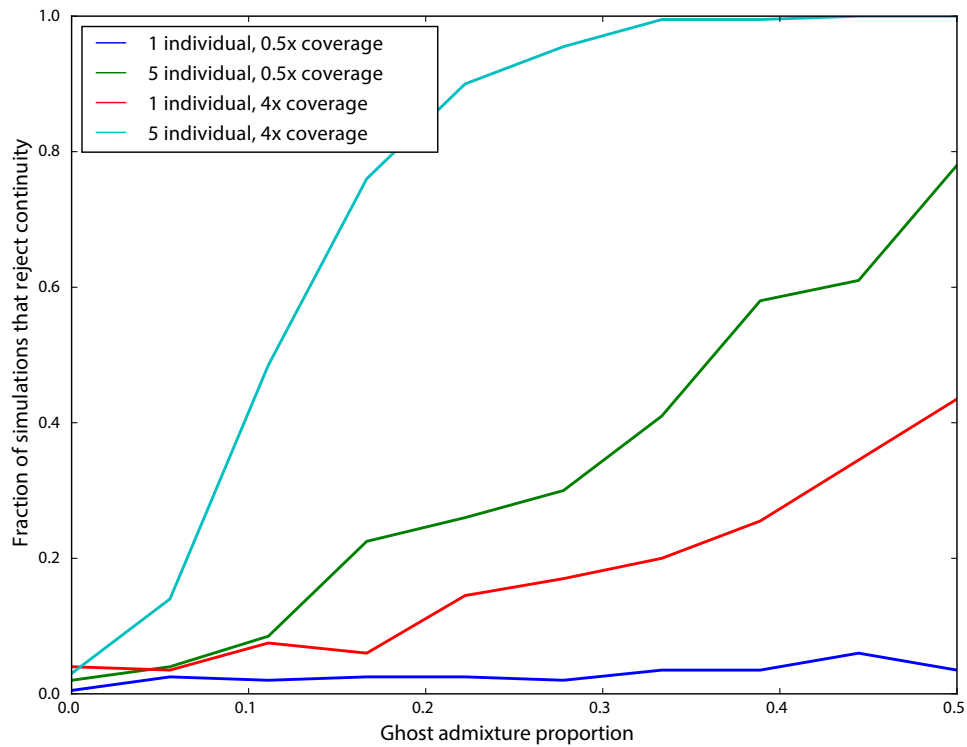

Figure 5: Impact of ghost admixture on falsely rejecting continuity. The  $x$  axis shows the admixture proportion from the ghost population, and the  $y$  axis shows the fraction of simulations in which continuity was rejected. Each line corresponds to a different sampling strategy, as indicated in the legend.

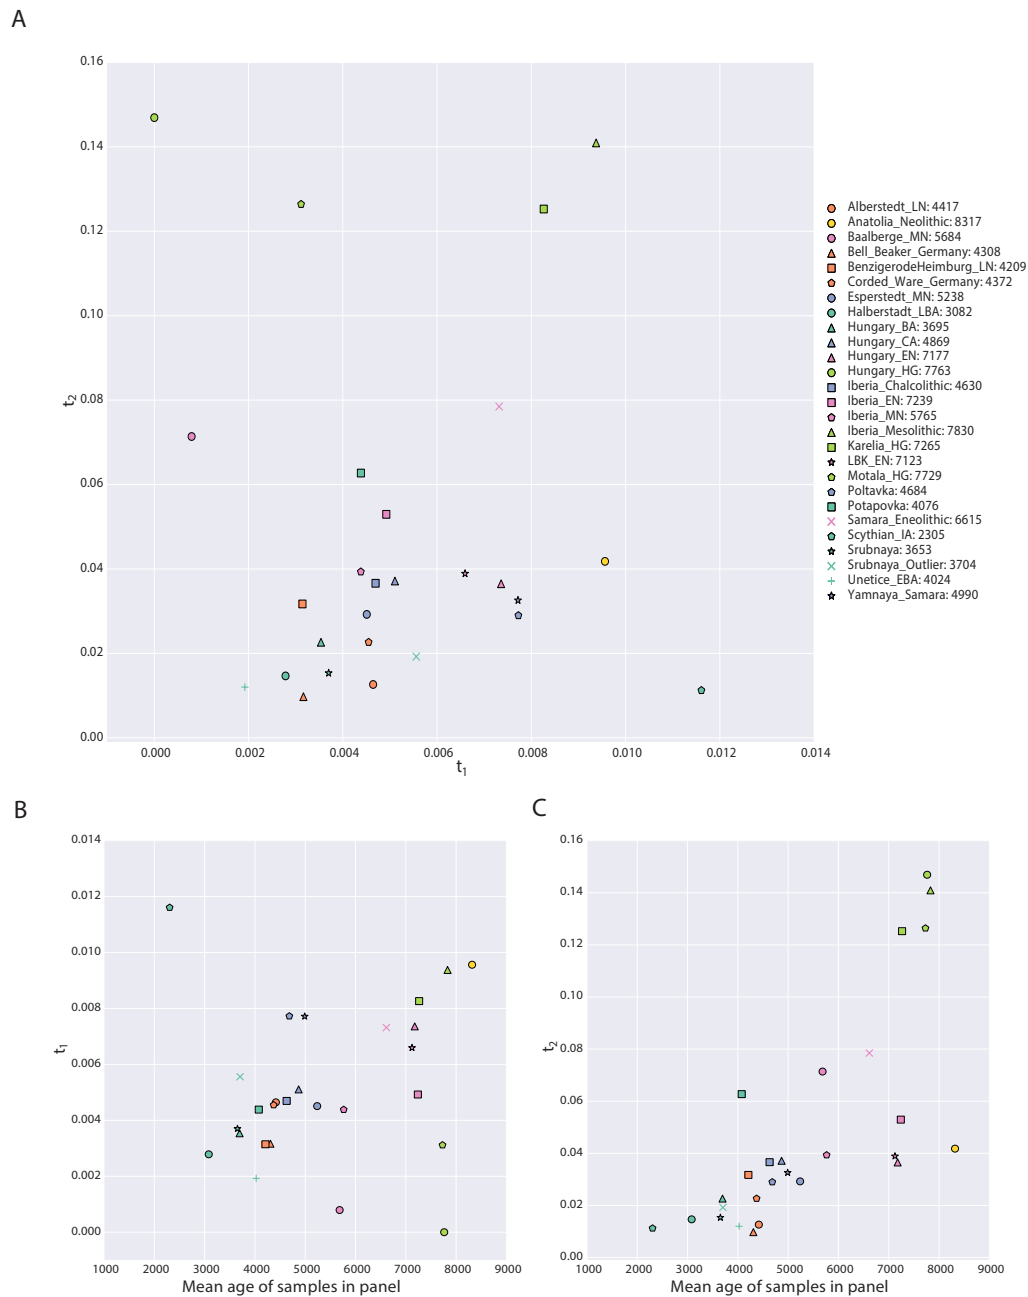

Figure 6: Parameters of the model inferred from ancient West Eurasian samples. Panel A shows  $t_1$  on the x-axis and  $t_2$  on the y-axis, with each point corresponding to a population as indicated in the legend. Numbers in the legend correspond to the mean date of all samples in the population. Panels B and C show scatterplots of the mean age of the samples in the population (x-axis) against  $t_1$  and  $t_2$ , respectively. Points are described by the same legend as Panel A.



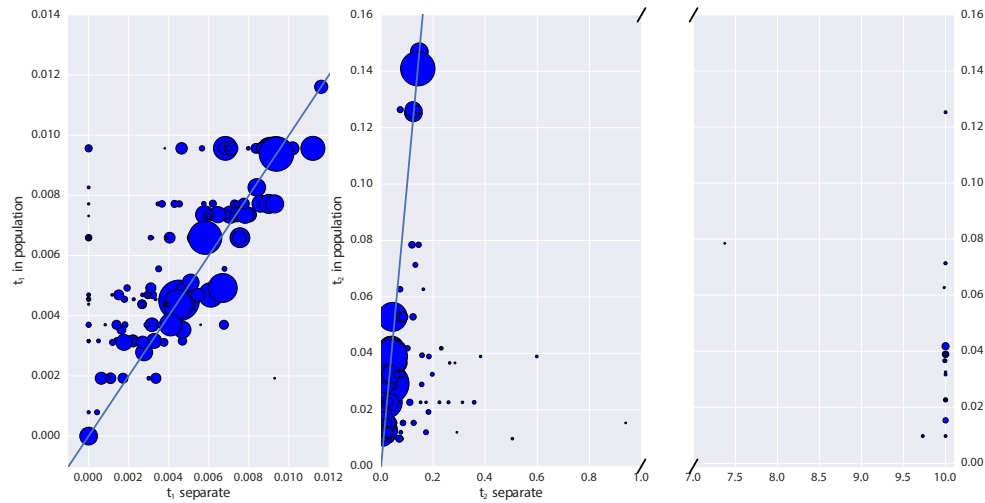

Figure 7: Impact of pooling individuals into populations when estimating model parameters from real data. In both panels, the x-axis indicates the parameter estimate when individuals are analyzed separately, while the y-axis indicates the parameter estimate when individuals are grouped into populations. Size of points is proportional to the coverage of each individual. Panel A reports the impact on estimation of  $t_1$ , while Panel B reports the impact on  $t_2$ . Note that Panel B has a broken x-axis. Solid lines in each figure indicate  $y = x$ .

| pop                    | cov    | date     | $t_1$ | $t_2$ | lnL          | $t_1$ (cont) | lnL (cont)   |
|------------------------|--------|----------|-------|-------|--------------|--------------|--------------|
| Alberstedt_LN          | 12.606 | 4417.000 | 0.005 | 0.013 | -779411.494  | 0.006        | -779440.143  |
| Anatolia_Neolithic     | 3.551  | 8317.500 | 0.010 | 0.042 | -9096440.714 | 0.044        | -9106156.877 |
| Baalberge_MN           | 0.244  | 5684.333 | 0.001 | 0.071 | -201575.306  | 0.007        | -201750.419  |
| Bell_Beaker_Germany    | 1.161  | 4308.444 | 0.003 | 0.010 | -1834486.744 | 0.008        | -1834652.858 |
| BenzigerodeHeimburg_LN | 0.798  | 4209.750 | 0.003 | 0.032 | -346061.545  | 0.007        | -346134.356  |
| Corded_Ware_Germany    | 2.250  | 4372.833 | 0.005 | 0.023 | -2139002.723 | 0.017        | -2139858.192 |
| Esperstedt_MN          | 30.410 | 5238.000 | 0.005 | 0.029 | -975890.329  | 0.009        | -976047.889  |
| Halberstadt_LBA        | 5.322  | 3082.000 | 0.003 | 0.015 | -558966.522  | 0.004        | -558993.078  |
| Hungary_BA             | 3.401  | 3695.750 | 0.004 | 0.023 | -789754.969  | 0.010        | -789939.889  |
| Hungary_CA             | 5.169  | 4869.500 | 0.005 | 0.037 | -504413.094  | 0.010        | -504549.603  |
| Hungary_EN             | 4.033  | 7177.000 | 0.007 | 0.036 | -3478429.262 | 0.033        | -3481855.461 |
| Hungary_HG             | 5.807  | 7763.000 | 0.000 | 0.147 | -469887.471  | 0.015        | -471652.083  |
| Iberia_Chalcolithic    | 1.686  | 4630.625 | 0.005 | 0.037 | -2351769.869 | 0.028        | -2354249.543 |
| Iberia_EN              | 4.875  | 7239.500 | 0.005 | 0.053 | -1483274.628 | 0.030        | -1485675.934 |
| Iberia_MN              | 5.458  | 5765.000 | 0.004 | 0.039 | -1491407.962 | 0.023        | -1492793.179 |
| Iberia_Mesolithic      | 21.838 | 7830.000 | 0.009 | 0.141 | -720759.133  | 0.030        | -723091.935  |
| Karelia_HG             | 2.953  | 7265.000 | 0.008 | 0.125 | -652952.676  | 0.033        | -655352.439  |
| LBK_EN                 | 2.894  | 7123.429 | 0.007 | 0.039 | -3656617.954 | 0.033        | -3660838.639 |
| Motala_HG              | 2.207  | 7729.500 | 0.003 | 0.126 | -1477338.076 | 0.068        | -1489573.895 |
| Poltavka               | 2.211  | 4684.500 | 0.008 | 0.029 | -1334662.071 | 0.020        | -1335358.630 |
| Potapovka              | 0.267  | 4076.500 | 0.004 | 0.063 | -220112.816  | 0.011        | -220251.379  |
| Samara_Eneolithic      | 0.463  | 6615.000 | 0.007 | 0.078 | -362161.674  | 0.020        | -362689.209  |
| Scythian_IA            | 3.217  | 2305.000 | 0.012 | 0.011 | -492961.306  | 0.013        | -492973.694  |
| Srubnaya               | 1.662  | 3653.273 | 0.004 | 0.015 | -2578065.957 | 0.013        | -2578645.731 |
| Srubnaya_Outlier       | 0.542  | 3704.500 | 0.006 | 0.019 | -285828.766  | 0.008        | -285851.523  |
| Unetice_EBA            | 1.320  | 4024.786 | 0.002 | 0.012 | -1676798.610 | 0.008        | -1677026.310 |
| Yamnaya_Samara         | 1.937  | 4990.500 | 0.008 | 0.033 | -2440183.354 | 0.028        | -2442192.801 |

Table 1: Details of populations included in analysis. “pop” is population name, “cov” is mean coverage of individuals in the population, “date” is mean date of individuals in the population, “ $t_1$ ” is the maximum likelihood estimate of  $t_1$  in the full model, “ $t_2$ ” is the maximum likelihood estimate of  $t_2$  in the full model, “LnL” is the maximum likelihood value in the full model, “ $t_1$  (cont)” is the maximum likelihood estimate of  $t_1$  in the model where  $t_2 = 0$ , “LnL” is the maximum likelihood value in the model where  $t_2 = 0$ .
